# Supplementary figures and images for: Evolution of Olfactory Receptor Genes in Primates Dominated by Birth-and-Death Process
Source: PubMed Central journal article supplement — Genome Biol Evol. 2009 Aug 4;1:258–64. doi: 10.1093/gbe/evp026 (PMC2817421; doi:10.1093/gbe/evp026), 2009-08-04

# Supplementary Figure 1

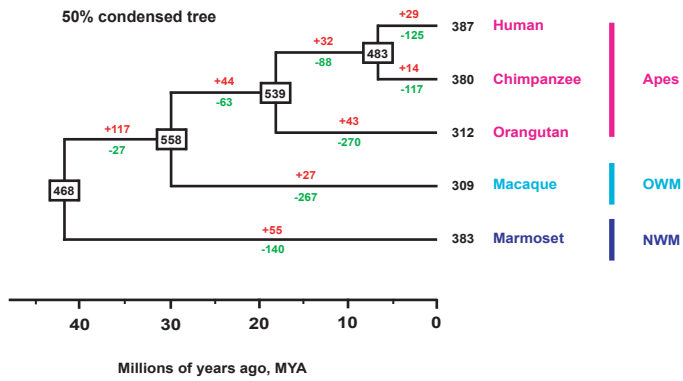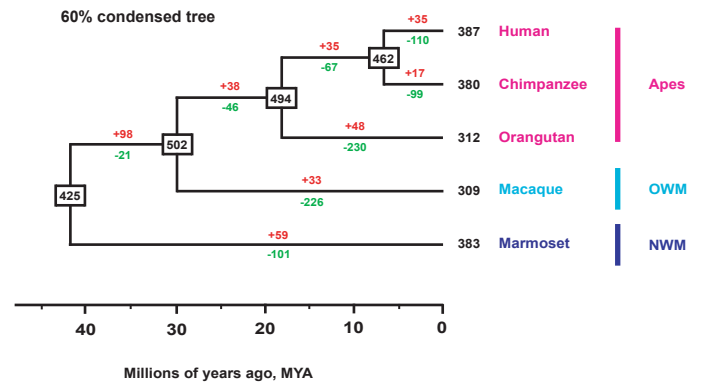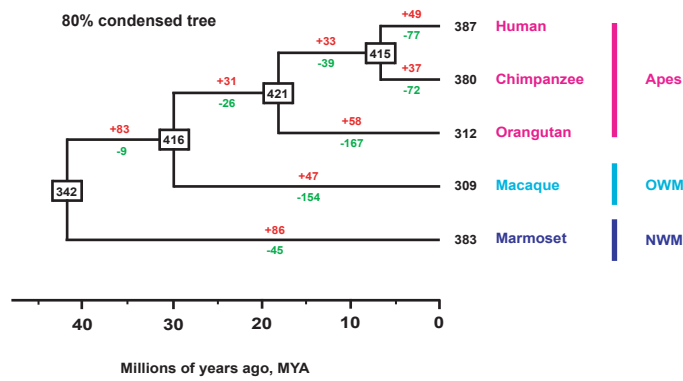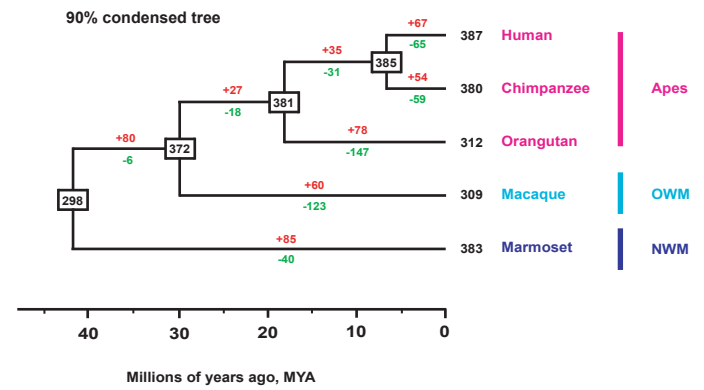

Supplement: evp026_1.pdf [file evp026_1.pdf]
